# Supplementary material
Source: PubMed Central journal article supplement (PMC3501056)
Supplement: supp_M112.414292_Table_S1.pdf [file supp_M112.414292_Table_S1.pdf]

**TABLE S1.** List of primers used in this work.

| Primer             | Created vector                       | Sequence (5'-3')                                                                |
|--------------------|--------------------------------------|---------------------------------------------------------------------------------|
| S_AtREM1.3_NdeIF   | pETDuet1-<br>StrepII_AtREM1.3        | TACGTCCATATGGCTAGCTGGAGCCACCCGAGTTTCGA<br>AAAAATCGAAGGGCGCTTAGAAACATCCACACGTTGC |
| AtREM1.3_XhoIR     | pETDuet1-<br>StrepII_AtREM1.3        | TACGTCCTCGAGTTAGAAACATCCACACGTTGC                                               |
| AtREM1.3-N_XhoIR   | pETDuet1-<br>StrepII_AtREM1.3-N      | TACGTCCTCGAGTTATTCCAAGTCGGCAAGTATC                                              |
| S_AtREM1.3-C_NdeIF | pETDuet1-<br>StrepII_AtREM1.3-C      | TACGTCCATATGAAAGAGAAGAAAACGTCATTC                                               |
| AtREM1.3-CΔ_XhoIR  | pETDuet1-<br>StrepII_AtREM1.3-<br>CΔ | TACGTCCTCGAGTTATTTAGCTTCAACCATTGCTCTC                                           |
| AtREM1.3_BsaIF     | pENTR-D-<br>AtREM1.3-N               | TTTGGTCTCACCTTATGGCGGAGGAGCAAAAAGACG                                            |
| AtREM1.3_BsaIR     | pENTR-D-<br>AtREM1.3-C               | AAAGGTCTCACCTTCAAACATCCACACGTTGC                                                |
| AtREM1.3-N_BsaIR   | pENTR-D-<br>AtREM1.3-N               | AAAGGTCTCACCTTCTATTCCAAGTCGGCAAGTATC                                            |
| AtREM1.3-C_BsaIF   | pENTR-D-<br>AtREM1.3-C               | TTTGGTCTCACCTTATGAAAGAGAAGAAAACGTCATTC                                          |
| IMPa1_BsaIF        | pENTR-D- IMPa1                       | TTTGGTCTCTCACCATGTCACTCAGACCCAACGCTAAGA                                         |
| IMPa1_BsaIR        | pENTR-D- IMPa1                       | AAAGGTCTCACCTTTCAGCTGAAGTTGAATCCTCCG                                            |
| IMPa2_BsaIF        | pENTR-D- IMPa2                       | TTTGGTCTCTCACCATGTCTTTAAGACCTAACGCTAAGA                                         |
| IMPa2_BsaIR        | pENTR-D- IMPa2                       | AAAGGTCTCACCTTTCAGCTGAAGTTGAATCCACCT                                            |
| IMPa3_BsaIF        | pENTR-D- IMPa3                       | TTTGGTCTCTCACCATGTCTCTCAGACCTAGCGCGAAGA                                         |
| IMPa3_BsaIR        | pENTR-D- IMPa3                       | AAAGGTCTCACCTTTCAAATAAAGTTGAATTGACCA                                            |
| IMPa6_BsaIF        | pENTR-D- IMPa6                       | TTTGGTCTCTCACCATGTCTTACAAACCAAGCGCGAAGA<br>CT                                   |
| IMPa6_BsaIR        | pENTR-D- IMPa6                       | AAAGGTCTCACCTTTCAAACCAAGTTGAATCCACCCGTA<br>GGA                                  |
| AtREM1.3_S66A_F    | pKS- AtREM1.3-<br>S66A               | AAGAAAGCTTCATCTGGTgGgGCCG                                                       |
| AtREM1.3_S66D_F    | pKS- AtREM1.3-<br>S66D               | AAGAAAGCTTCATCTGGTgacGCCG                                                       |
| AtREM1.3_P_R       | pKS- AtREM1.3-<br>S66A               | AGGTGTATGCTCCTCGATGGG                                                           |

Underline and lowercase indicate restriction sites and mutated nucleotides, respectively.
