# Supplementary material
Source: PubMed Central journal article supplement (PMC3501056)
Supplement: supp_M112.414292_Table_S2.pdf [file supp_M112.414292_Table_S2.pdf]

**TABLE S2.** List of constructs used in this work.

| Vector                | Description                                                                        | Reference |
|-----------------------|------------------------------------------------------------------------------------|-----------|
| pETDuet-1             | Co-expression vector                                                               | Novagen   |
| pETDuet1-AtREM1.3     | Vector for StrepII_AtREM1.3 expression under the T7 promoter                       | This work |
| pETDuet1-AtREM1.3-N   | Vector for StrepII_AtREM1.3-N expression under the T7 promoter                     | This work |
| pETDuet1-AtREM1.3-CA  | Vector for StrepII_AtREM1.3-C expression under the T7 promoter                     | This work |
| pKS-AtREM1.3          | Gateway compatible entry vector encoding the full-length AtREM1.3                  | This work |
| pENTR-D-AtREM1.3-N    | Gateway compatible entry vector encoding the AtREM1.3-N variant                    | This work |
| pENTR-D-AtREM1.3-C    | Gateway compatible entry vector encoding the AtREM1.3-C variant                    | This work |
| pENTR-D-AtREM1.3-CA   | Gateway compatible entry vector encoding the AtREM1.3-CA variant                   | This work |
| pKS-AtREM1.3-S66A     | Gateway compatible entry vector encoding AtREM1.3-S66A                             | This work |
| pKS-AtREM1.3-S66D     | Gateway compatible entry vector encoding AtREM1.3-S66D                             | This work |
| pENTR-D-IMPα1         | Gateway compatible entry vector encoding AtIMPα1                                   | This work |
| pENTR-D-IMPα2         | Gateway compatible entry vector encoding AtIMPα2                                   | This work |
| pENTR-D-IMPα3         | Gateway compatible entry vector encoding AtIMPα3                                   | This work |
| pENTR-D-IMPα6         | Gateway compatible entry vector encoding AtIMPα6                                   | This work |
| pGBKT7::GW            | Gateway compatible yeast expression vector for GAL4 binding domain (BD) fusions    | (1)       |
| pGADT7::GW            | Gateway compatible yeast expression vector for GAL4 activation domain (AD) fusions | (1)       |
| pGADT7-AtREM1.3       | Yeast expression vector for HA-GAL4AD-AtREM1.3                                     | This work |
| pGBKT7-AtREM1.3       | Yeast expression vector for cMyc-GAL4BD-AtREM1.3                                   | This work |
| pGADT7-AtREM1.3-N     | Yeast expression vector for HA-GAL4AD-AtREM1.3-N                                   | This work |
| pGBKT7-AtREM1.3-N     | Yeast expression vector for cMyc-GAL4BD-AtREM1.3-N                                 | This work |
| pGADT7-AtREM1.3-C     | Yeast expression vector for HA-GAL4AD-AtREM1.3-C                                   | This work |
| pGBKT7-AtREM1.3-C     | Yeast expression vector for cMyc-GAL4BD-AtREM1.3-C                                 | This work |
| pGADT7-AtREM1.3-CA    | Yeast expression vector for HA-GAL4AD-AtREM1.3-CA                                  | This work |
| pGBKT7-AtREM1.3-CA    | Yeast expression vector for cMyc-GAL4BD-AtREM1.3-CA                                | This work |
| pGADT7-AtREM1.3-S66A  | Yeast expression vector for HA-GAL4AD-AtREM1.3-S66A                                | This work |
| pGADT7-AtREM1.3-S66D  | Yeast expression vector for cMyc-GAL4BD-AtREM1.3-S66D                              | This work |
| pGBKT7-IMPα1          | Yeast expression vector for cMyc-GAL4BD-IMPα1                                      | This work |
| pGBKT7-IMPα2          | Yeast expression vector for cMyc-GAL4BD-IMPα2                                      | This work |
| pGBKT7-IMPα3          | Yeast expression vector for cMyc-GAL4BD-IMPα3                                      | This work |
| pGBKT7-IMPα6          | Yeast expression vector for cMyc-GAL4BD-IMPα6                                      | This work |
| pAM-PAT-YFPn::GW      | Gateway compatible plant expression vector for YFPn BiFC fusions                   | (2)       |
| pAM-PAT-YFPc::GW      | Gateway compatible plant expression vector for YFPc BiFC fusions                   | (2)       |
| pAM-PAT-YFPn-AtREM1.3 | Plant expression vector for YFPn-AtREM1.3 fusions                                  | This work |
| pAM-PAT-YFPc-AtREM1.3 | Plant expression vector for YFPc-AtREM1.3 fusions                                  | This work |
| pAM-PAT-YFPn-AtIMPα1  | Plant expression vector for YFPn-AtIMPα1 fusions                                   | This work |
| pAM-PAT-YFPc-AtIMPα1  | Plant expression vector for YFPc-AtIMPα1 fusions                                   | This work |
| pAM-PAT-YFPn-AtIMPα2  | Plant expression vector for YFPn-AtIMPα2 fusions                                   | This work |
| pAM-PAT-YFPc-AtIMPα2  | Plant expression vector for YFPc-AtIMPα2 fusions                                   | This work |
| pAM-PAT-YFPn-AtIMPα3  | Plant expression vector for YFPn-AtIMPα3 fusions                                   | This work |
| pAM-PAT-YFPc-AtIMPα3  | Plant expression vector for YFPc-AtIMPα3 fusions                                   | This work |
| pAM-PAT-YFPn-AtIMPα6  | Plant expression vector for YFPn-AtIMPα6 fusions                                   | This work |
| pAM-PAT-YFPc-AtIMPα6  | Plant expression vector for YFPc-AtIMPα6 fusions                                   | This work |
